1 The E484K mutation in the SARS-CoV-2 spike protein reduces but does not abolish neutralizing  
2 activity of human convalescent and post-vaccination sera.

3 Sonia Jangra, Ph.D.<sup>1,2,#</sup>, Chengjin Ye, Ph.D.<sup>3,#</sup>, Raveen Rathnasinghe, B.Sc.<sup>1,2,4</sup>, Daniel Stadlbauer,  
4 Ph.D.<sup>1</sup>, PVI study group<sup>1,2</sup>, Florian Krammer, Ph.D.<sup>1</sup>, Viviana Simon, M.D., Ph.D.<sup>1,2,5</sup>, Luis Martinez-  
5 Sobrido, Ph.D.<sup>3</sup>, Adolfo García-Sastre, Ph.D.<sup>1,2,5,6,\*</sup>, Michael Schotsaert, Ph.D.<sup>1,2,\*</sup>

6 # Contributed equally

7 \*Corresponding authors: [Adolfo.Garcia-Sastre@mssm.edu](mailto:Adolfo.Garcia-Sastre@mssm.edu), [Michael.Schotsaert@mssm.edu](mailto:Michael.Schotsaert@mssm.edu)

8 <sup>1</sup>Department of Microbiology, Icahn School of Medicine at Mount Sinai New York, NY, USA

9 <sup>2</sup>Global Health and Emerging Pathogens Institute, Icahn School of Medicine at Mount Sinai New  
10 York, NY, USA

11 <sup>3</sup>Texas Biomedical Research Institute, San Antonio, TX, USA

12 <sup>4</sup>Graduate School of Biomedical Sciences, Icahn School of Medicine at Mount Sinai, New York,  
13 NY, USA

14 <sup>5</sup>Department of Medicine, Division of Infectious Diseases, Icahn School of Medicine at Mount  
15 Sinai New York, NY, USA

16 <sup>6</sup>The Tisch Cancer Institute, Icahn School of Medicine at Mount Sinai New York, NY, USA

17

## 18 **Abstract**

19 One year in the coronavirus disease 2019 (COVID-19) pandemic, the first vaccines are being  
20 rolled out under emergency use authorizations. It is of great concern that newly emerging  
21 variants of severe acute respiratory syndrome coronavirus 2 (SARS-CoV-2) can escape antibody-  
22 mediated protection induced by previous infection or vaccination through mutations in the  
23 spike protein. The glutamate (E) to Lysine (K) substitution at position 484 (E484K) in the  
24 receptor binding domain (RBD) of the spike protein is present in the rapidly spreading variants  
25 of concern belonging to the B.1.351 and P.1 lineages. We performed *in vitro*  
26 microneutralization assays with both the USA-WA1/2020 virus and a recombinant (r)SARS-CoV-  
27 2 virus that is identical to USA-WA1/2020 except for the E484K mutation introduced in the  
28 spike RBD. We selected 34 sera from study participants based on their SARS-CoV-2 spike ELISA  
29 antibody titer (negative [N=4] versus weak [N=8], moderate [N=11] or strong positive [N=11]).  
30 In addition, we included sera from five individuals who received two doses of the Pfizer SARS-  
31 CoV-2 vaccine BNT162b2. Serum neutralization efficiency was lower against the E484K rSARS-  
32 CoV-2 (vaccination samples: 3.4 fold; convalescent low IgG: 2.4 fold, moderate IgG: 4.2 fold and  
33 high IgG: 2.6 fold) compared to USA-WA1/2020. For some of the convalescent donor sera with  
34 low or moderate IgG against the SARS-CoV-2 spike, the drop in neutralization efficiency resulted  
35 in neutralization ID<sub>50</sub> values similar to negative control samples, with low or even absence of  
36 neutralization of the E484K rSARS-CoV-2. However, human sera with high neutralization titers  
37 against the USA-WA1/2020 strain were still able to neutralize the E484K rSARS-CoV-2.  
38 Therefore, it is important to aim for the highest titers possible induced by vaccination to  
39 enhance protection against newly emerging SARS-CoV-2 variants. Two vaccine doses may be  
40 needed for induction of high antibody titers against SARS-CoV-2. Postponing the second  
41 vaccination is suggested by some public health authorities in order to provide more individuals  
42 with a primer vaccination. Our data suggests that this may leave vaccinees less protected  
43 against newly emerging variants.

## 44 Introduction

45 One year in the coronavirus disease 2019 (COVID-19) pandemic, the first vaccines are being rolled  
46 out under emergency use authorizations. Recently, rapidly spreading variants of severe acute  
47 respiratory syndrome coronavirus 2 (SARS-CoV-2), the virus that causes COVID-19, have been  
48 reported. It is of great concern that these newly emerging variants can escape neutralizing  
49 antibodies induced by previous infection and/or vaccination through mutations in the spike (S)  
50 protein, including the receptor binding domain (RBD), a target for neutralizing antibodies. We  
51 and others have previously reported that the asparagine (N) to tyrosine (Y) substitution at  
52 position 501 (N501Y), present in variants of concern belonging to the B.1.1.7, B.1.351 and P.1  
53 lineages, does not seem to affect *in vitro* neutralization of SARS-CoV-2 viruses by human sera  
54 from convalescent or vaccinated human donors. However, there remains concern about  
55 additional substitutions like E484K present in B.1.351 and P.1 lineages allowing escape from  
56 neutralizing antibodies (1–4), thereby potentially rendering vaccine-induced immunity less  
57 protective.

58 In order to investigate the impact of the E484K mutation in the neutralizing activity of SARS-CoV-  
59 2 specific antisera, we performed *in vitro* microneutralization assays with both the USA-  
60 WA1/2020 virus and a recombinant (r)SARS-CoV-2 virus that is identical to USA-WA1/2020 except  
61 for the E484K mutation introduced in the spike RBD.

62 The E484K mutant rSARS-CoV-2 was generated using previously described reverse genetics based  
63 on the use of a bacterial artificial chromosome (BAC) (5–7). The USA-WA1/2020 reflects SARS-  
64 CoV-2 strains that circulated in the early phase of the COVID-19 pandemic. A total of 34 sera were  
65 selected from study participants based on their SARS-CoV-2 S enzyme linked immunosorbent

66 assay (ELISA) antibody titer (negative [N=4] versus weak [N=8], moderate [N=11] or strong  
67 positive [N=11]). In addition, we included sera from five individuals who received two doses of  
68 the Pfizer SARS-CoV-2 vaccine BNT162b2 (V1-V5). Demographics and available metadata for each  
69 participant is summarized in Supplementary Table 1. We performed all experiments in a blinded  
70 manner. The same sera have been tested for neutralization studies with a N501Y SARS-CoV-2  
71 variant in our recent report (8).

## 72 **Results**

73 Sera from vaccinated donors gave high neutralization titers, similar to convalescent samples with  
74 the highest neutralization titers. Serum neutralization efficiency was lower against the E484K  
75 rSARS-CoV-2 (vaccination samples: 3.4 fold; convalescent low IgG: 2.4 fold, moderate IgG: 4.2  
76 fold and high IgG: 2.6 fold based on geometric means) which was significantly different for the  
77 convalescent sera (see Figure 1), suggesting that the single E484K mutation in the RBD affects  
78 binding by serum polyclonal neutralizing antibodies from both convalescent and vaccinated  
79 donors. In the case of convalescent donor sera with low or moderate IgG against SARS-CoV-2 S  
80 protein, the drop in neutralization efficiency could result in neutralization ID<sub>50</sub> values similar to  
81 negative control samples, resulting in low or even absence of neutralization of the E484K  
82 recombinant virus by those sera.

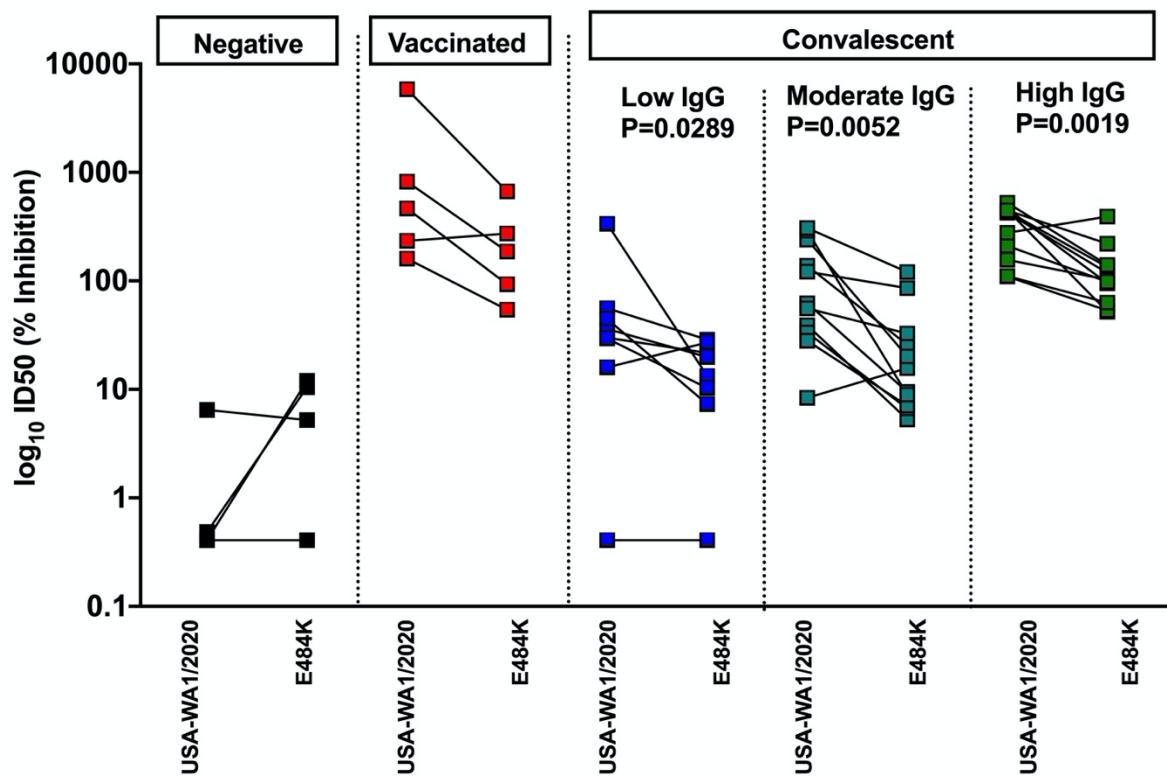

83  
84 Figure 1. Human convalescent and post-vaccination sera neutralize E484K rSARS-CoV-2 less  
85 efficient than USA-WA1/2020 in an *in vitro* microneutralization assay. Convalescent sera are  
86 subdivided in low, moderate and high IgG classes based on anti-spike ELISA titers. Two-sided  
87 Mann Whitney-U tests were performed to calculate statistical differences.

## 88 Conclusions

89 These data indicate that the E484K mutation present in circulating SARS-CoV-2 strains that  
90 belong to the B.1.351 and P.1 lineages reduces the neutralizing activity of human polyclonal sera  
91 induced in convalescent (infected with previous strains) and vaccinated individuals. The  
92 significant impact of a single point mutation in the neutralizing activity of polyclonal sera  
93 highlights the need for the rapid characterization of SARS-CoV-2 variants. However, human sera  
94 with high neutralization titers against the USA-WA1/2020 strain were still able to neutralize the

95 E484K rSARS-CoV-2. Therefore, it is important to aim for the highest titers possible induced by  
96 vaccination, as this should enhance the chances for protection even in the case of antigenic drift  
97 of circulating SARS-CoV-2 strains. Currently deployed SARS-CoV-2 vaccines are recommended as  
98 a prime-boost regimen. Because of vaccine shortage and relatively strong seroconversion being  
99 observed after a single dose, some public health authorities recommended to postpone the  
100 second booster vaccination in order to be able to provide more individuals with a first primer  
101 vaccination. This will result in lower neutralizing antibody titers. Our data show that this may be  
102 problematic in the context of newly emerging SARS-CoV-2 variants, as it may leave some  
103 vaccinees unprotected. It is currently unknown which neutralization titer correlates with (full)  
104 protection, and to what extent immune mechanisms beyond direct virus neutralization  
105 contribute to protection, especially for specific target groups with comorbidities that are  
106 currently being prioritized for vaccination.

107 Viruses that belong to the B.1.351 and P.1 lineages have originally been described in the Republic  
108 of South Africa and Brazil, but are now reported on multiple continents already. Therefore, while  
109 it is premature to update vaccines based on these lineages, it is important that the worldwide  
110 vaccination effort will aim at fully vaccinating as many people as possible using vaccination  
111 strategies that result in induction of high neutralizing antibody titers.

112

113

114

115

## 116 **References**

- 117 1. Weisblum Y, Schmidt F, Zhang F, DaSilva J, Poston D, Lorenzi JC, et al. Escape from  
118 neutralizing antibodies by SARS-CoV-2 spike protein variants. *eLife* [Internet]. [cited 2020  
119 Dec 22];9. Available from: <https://www.ncbi.nlm.nih.gov/pmc/articles/PMC7723407/>
- 120 2. Greaney AJ, Loes AN, Crawford KHD, Starr TN, Malone KD, Chu HY, et al. Comprehensive  
121 mapping of mutations to the SARS-CoV-2 receptor-binding domain that affect recognition  
122 by polyclonal human serum antibodies. *bioRxiv*. 2021 Jan 4;2020.12.31.425021.
- 123 3. Wang Z, Schmidt F, Weisblum Y, Muecksch F, Barnes CO, Finkin S, et al. mRNA vaccine-  
124 elicited antibodies to SARS-CoV-2 and circulating variants. *bioRxiv*. 2021 Jan  
125 19;2021.01.15.426911.
- 126 4. Wu K, Werner AP, Moliva JJ, Koch M, Choi A, Stewart-Jones GBE, et al. mRNA-1273 vaccine  
127 induces neutralizing antibodies against spike mutants from global SARS-CoV-2 variants.  
128 *bioRxiv*. 2021 Jan 25;2021.01.25.427948.
- 129 5. Chiem K, Morales Vasquez D, Park J-G, Platt RN, Anderson T, Walter MR, et al. Generation  
130 and Characterization of recombinant SARS-CoV-2 expressing reporter genes. *J Virol*. 2021  
131 Jan 11;
- 132 6. Chiem K, Ye C, Martinez-Sobrido L. Generation of Recombinant SARS-CoV-2 Using a  
133 Bacterial Artificial Chromosome. *Curr Protoc Microbiol* [Internet]. 2020 Dec [cited 2021 Jan  
134 25];59(1). Available from: <https://www.ncbi.nlm.nih.gov/pmc/articles/PMC7646048/>

- 135 7. Ye C, Chiem K, Park J-G, Oladunni F, Platt RN, Anderson T, et al. Rescue of SARS-CoV-2 from  
136 a Single Bacterial Artificial Chromosome. *mBio* [Internet]. 2020 Sep 25 [cited 2021 Jan  
137 25];11(5). Available from: <https://www.ncbi.nlm.nih.gov/pmc/articles/PMC7520601/>
- 138 8. Rathnasinghe R, Jangra S, Cupic A, Martínez-Romero C, Mulder LCF, Kehrer T, et al. The  
139 N501Y mutation in SARS-CoV-2 spike leads to morbidity in obese and aged mice and is  
140 neutralized by convalescent and post-vaccination human sera. *medRxiv*. 2021 Jan  
141 20;2021.01.19.21249592.
- 142
- 143



144 **Acknowledgements**

145 PVI study group (in alphabetical order): H. Alshammary, A. Amoako, M. Awawda, K. Beach, C.  
146 M. Bermúdez-González, R. Chernet, L. Eaker, E. Ferreri, D. Floda, C. Gleason, Dr. G. Kleiner, D.  
147 Jurczynszak, J. Matthews, W. Mendez, Dr. LCF Mulder, K. Russo, A. Salimbangon, Dr. M. Saksena,  
148 A. Shin, L. Sominsky and K. Srivastava.

149 We thank all the study participants for their continued support of COVID19 research. This  
150 research was partly funded by CRIP (Center for Research for Influenza Pathogenesis), a NIAID  
151 supported Center of Excellence for Influenza Research and Surveillance (CEIRS, contract #  
152 HHSN272201400008C); by NCI grant U54CA260560; by the generous support of the JPB  
153 Foundation and the Open Philanthropy Project (research grant 2020-215611 (5384); and by  
154 anonymous donors to A.G-S. Work on SARS-CoV-2 in the Krammer and Simon laboratories was  
155 funded by the Collaborative Influenza Vaccine Innovation Centers (CIVIC) contract  
156 75N93019C00051. Research in Martinez-Sobrido laboratory was partially funded by the New  
157 York Influenza Center of Excellence (NYICE), a member of the National Institute of Allergy and  
158 Infectious Diseases (NIAID), National Institutes of Health (NIH), Department of Health and  
159 Human Services, Centers of Excellence for Influenza Research and Surveillance (CEIRS) contract  
160 No. HHSN272201400005C (NYICE).

161 **Conflicts of interest**

162 The García-Sastre Laboratory has received research support from Pfizer, Senhwa Biosciences  
163 and 7Hills Pharma. Adolfo García-Sastre has consulting agreements for the following companies  
164 involving cash and/or stock: Vivaldi Biosciences, Contrafect, 7Hills Pharma, Avimex, Vaxalto,  
165 Accurius and Esperovax. The Icahn School of Medicine at Mount Sinai has filed patent

166 applications relating to SARS-CoV-2 serological assays and NDV-based SARS-CoV-2 vaccines  
167 which list Florian Krammer as co-inventor. Daniel Stadlbauer and Viviana Simon are also listed  
168 on the serological assay patent application as co-inventors. Florian Krammer has consulted for  
169 Merck and Pfizer (before 2020), and is currently consulting for Seqirus and Avimex. The  
170 Krammer laboratory is also collaborating with Pfizer on animal models of SARS-CoV-2.

171 **Supplementary Table 1: Description of serum samples obtained from human**  
 172 **subjects**

173

| SERUM                   |                    |     |                 |                                   |  |
|-------------------------|--------------------|-----|-----------------|-----------------------------------|--|
| Seropositive, vaccine   | Spike IgG response | Sex | Age group (yrs) | Days post 1 vaccine dose (Pfizer) |  |
| V1                      | Strong positive    | F   | >60             | 68                                |  |
| V2                      | Strong positive    | M   | 30-40           | 47                                |  |
| V3                      | Strong positive    | F   | 50-60           | 47                                |  |
| V4                      | Strong positive    | F   | 40-50           | 49                                |  |
| V5                      | Strong positive    | F   | 30-40           | 48                                |  |
| Seropositive, infection | Spike IgG response | Sex | Age group (yrs) | Days post onset of symptoms       |  |
| P1                      | Weak positive      | M   | 20-29           | 260                               |  |
| P2                      | Weak positive      | M   | 50-59           | NA                                |  |
| P3                      | Weak positive      | F   | 30-39           | 111                               |  |
| P4                      | Weak positive      | F   | 30-39           | 221                               |  |
| P5                      | Weak positive      | F   | 30-39           | 254                               |  |
| P6                      | Weak positive      | F   | 20-29           | 247                               |  |
| P7                      | Weak positive      | M   | 30-39           | 220                               |  |
| P8                      | Weak positive      | F   | 20-29           | Asymptomatic                      |  |
| P9                      | Moderate positive  | M   | 30-39           | NA                                |  |
| P10                     | Moderate positive  | F   | 30-39           | 197                               |  |
| P11                     | Moderate positive  | F   | 50-59           | Asymptomatic                      |  |
| P12                     | Moderate positive  | F   | 30-39           | Asymptomatic                      |  |
| P13                     | Moderate positive  | M   | 30-39           | 234                               |  |
| P14                     | Moderate positive  | F   | 20-29           | 273                               |  |
| P15                     | Moderate positive  | M   | 30-39           | Asymptomatic                      |  |
| P16                     | Moderate positive  | F   | 20-29           | 258                               |  |
| P17                     | Moderate positive  | F   | 20-29           | 246                               |  |
| P18                     | Moderate positive  | M   | 20-29           | Asymptomatic                      |  |
| P19                     | Moderate positive  | F   | 50-59           | 204                               |  |
| P20                     | Strong positive    | F   | 50-59           | NA                                |  |
| P21                     | Strong positive    | F   | 30-39           | 245                               |  |
| P22                     | Strong positive    | M   | NA              | 170                               |  |
| P23                     | Strong positive    | F   | >60             | Asymptomatic                      |  |
| P24                     | Strong positive    | F   | 40-49           | NA                                |  |
| P25                     | Strong positive    | F   | 50-59           | 191                               |  |
| P26                     | Strong positive    | F   | 30-39           | NA                                |  |
| P27                     | Strong positive    | F   | 50-59           | 113                               |  |
| P28                     | Strong positive    | M   | >60             | Asymptomatic                      |  |
| P29                     | Strong positive    | M   | 18-19           | 218                               |  |

|  | P30                            | Strong positive    | M   | 50-59              | 219                                 |
|--|--------------------------------|--------------------|-----|--------------------|-------------------------------------|
|  | Seronegative,<br>post pandemic | Spike IgG response | Sex | Age group<br>(yrs) | Days from last negative<br>serology |
|  | N1                             | Negative           | F   | 40-50              | 23                                  |
|  | N2                             | Negative           | F   | 20-29              | 24                                  |
|  | N3                             | Negative           | F   | 20-29              | 23                                  |
|  | N4                             | Negative           | F   | 30-35              | 22                                  |
|  |                                |                    |     |                    |                                     |

175 **Supplementary Methods section:**

176 **50% tissue culture infective dose (TCID<sub>50</sub>) calculation and *in vitro* microneutralization assay:**

177 To estimate the neutralizing efficiency of human sera, *in vitro* microneutralization assays were  
178 performed. Human sera were inactivated at 56°C for 30 min. Serum samples were serially diluted  
179 3-fold starting from 1:30 dilution in Vero-E6-infection medium (DMEM+ 2% FBS+ 1% non-  
180 essential amino acids). The samples were incubated with 450 tissue culture infective dose 50  
181 (TCID<sub>50</sub>) of either USA-WA1/2020 or rSARS-CoV-2 E484K for 1 hour in an incubator at 37°C, 5%  
182 CO<sub>2</sub> followed by incubation with pre-seeded Vero-E6 at 37°C for 48 hours. The plates were fixed  
183 in 4% formaldehyde at 4°C overnight. For TCID<sub>50</sub> calculation, the virus stock was serially diluted  
184 10-fold starting with 1:10 dilution and incubated on Vero-E6 cells for 48 hours followed by  
185 fixation in 4% Formaldehyde. The cells were washed with 1xPBS and permeabilized with 0.1%  
186 Triton X-100 in 1XPBS. The cells were washed again and blocked in 5% non-fat milk in 1xPBS+  
187 0.1% Tween-20 for 1 hour at room temperature. After blocking, the cells were incubated with  
188 anti-SARS-CoV-2 NP and anti-spike monoclonal antibodies, mixed in 1:1 ratio, for 1.5 hours at  
189 room temperature. The cells were washed in 1xPBS and incubated with 1:5000 diluted HRP-  
190 conjugated anti-mouse IgG secondary antibody for 1 hour at RT followed by a brief PBS wash.  
191 Finally, 100µl tetramethyl benzidine (TMB) substrate was added and incubated at RT until blue  
192 color appeared, and the reaction was terminated with 50µl 1M H<sub>2</sub>SO<sub>4</sub>. Absorbance was recorded  
193 at 450nm and 650nm and percentage reduction in infection was calculated as compared to  
194 negative control.

195

196

197 **Serum samples from human subjects:**

198 The study protocols for the collection of clinical specimens from individuals with and without  
199 SARS-CoV-2 infection by the Personalized Virology Initiative were reviewed and approved by the  
200 Mount Sinai Hospital Institutional Review Board (IRB-16-00791; IRB-20-03374). All participants  
201 provided informed consent prior to collection of specimen and clinical information. All specimens  
202 were coded prior to processing.

203

204
